# Supplementary material for: Postsurgical prescriptions for opioid naive patients and association with overdose and misuse: retrospective cohort study
Source: PubMed Central journal article supplement — BMJ. 2018 Jan 18;360:j5790. doi: 10.1136/bmj.j5790 (PMC5769574; doi:10.1136/bmj.j5790), 2018-01-18
Supplement: brag040635.ww1.pdf [file brag040635.ww1.pdf]

# Supplemental Tables and Figures

eTable 1: Table of ICD9 Codes of Pre-Operative Abuse and Post-Operative Abuse

eTable 2: All Events Cox Model

eFigure 1: CONSORT Protocol

eFigure 2: Prescribing Changes by Surgery Category

eFigure 3: Sensitivity Analysis with One-Year Events

eFigure 4: Sensitivity Analysis with No Intervening Surgery

## eTable 1: ICD Code Tables Used in the Study

### 1A: All Observed Outcome Codes

| ICD    | LONG DESCRIPTION                                                               | N in sample |
|--------|--------------------------------------------------------------------------------|-------------|
| 304.00 | Opioid type dependence, unspecified                                            | 2,203       |
| 304.01 | Opioid type dependence, continuous                                             | 1,311       |
| 305.50 | Opioid abuse, unspecified                                                      | 484         |
| 965.09 | Poisoning by other opiates and related narcotics                               | 409         |
| E935.2 | Other opiates and related narcotics causing adverse effects in therapeutic use | 384         |
| 965.00 | Poisoning by opium (alkaloids), unspecified                                    | 190         |
| 304.70 | Combinations of opioid type drug with any other drug dependence, unspecified   | 113         |
| 305.51 | Opioid abuse, continuous                                                       | 77          |
| 304.71 | Combinations of opioid type drug with any other drug dependence, continuous    | 72          |
| E850.2 | Accidental poisoning by other opiates and related narcotics                    | 63          |
| 304.02 | Opioid type dependence, episodic                                               | 39          |
| 305.53 | Opioid abuse, in remission                                                     | 35          |
| 305.52 | Opioid abuse, episodic                                                         | 30          |
| 304.72 | Combinations of opioid type drug with any other drug dependence, episodic      | 11          |

### 1B: All Abuse Codes Used for Exclusion Criteria

| ICD    | LONG DESCRIPTION                                     | N in sample |
|--------|------------------------------------------------------|-------------|
| 304.00 | Opioid type dependence, unspecified                  | 2,240       |
| 305.90 | Other, mixed, or unspecified drug abuse, unspecified | 1,625       |
| 304.01 | Opioid type dependence, continuous                   | 1,486       |
| 304.90 | Unspecified drug dependence, unspecified             | 1,417       |
| 977.9  | Poisoning by unspecified drug or medicinal substance | 1,076       |
| 292.0  | Drug withdrawal                                      | 956         |
| 305.50 | Opioid abuse, unspecified                            | 589         |
| 304.03 | Opioid type dependence, in remission                 | 283         |

|        |                                                                                                                     |     |
|--------|---------------------------------------------------------------------------------------------------------------------|-----|
| E935.2 | Other opiates and related narcotics causing adverse effects in therapeutic use                                      | 256 |
| 965.09 | Poisoning by other opiates and related narcotics                                                                    | 229 |
| 304.91 | Unspecified drug dependence, continuous                                                                             | 226 |
| 977.8  | Poisoning by other specified drugs and medicinal substances                                                         | 222 |
| 304.70 | Combinations of opioid type drug with any other drug dependence, unspecified                                        | 177 |
| 305.93 | Other, mixed, or unspecified drug abuse, in remission                                                               | 160 |
| 965.00 | Poisoning by opium (alkaloids), unspecified                                                                         | 145 |
| 305.51 | Opioid abuse, continuous                                                                                            | 134 |
| 304.71 | Combinations of opioid type drug with any other drug dependence, continuous                                         | 121 |
| 305.91 | Other, mixed, or unspecified drug abuse, continuous                                                                 | 120 |
| 305.53 | Opioid abuse, in remission                                                                                          | 90  |
| 305.53 | Opioid abuse, in remission                                                                                          | 90  |
| 304.02 | Opioid type dependence, episodic                                                                                    | 67  |
| E980.0 | Poisoning by analgesics, antipyretics, and antirheumatics, undetermined whether accidentally or purposely inflicted | 48  |
| 304.93 | Unspecified drug dependence, in remission                                                                           | 47  |
| E850.2 | Accidental poisoning by other opiates and related narcotics                                                         | 44  |
| 965.01 | Poisoning by heroin                                                                                                 | 43  |
| 305.92 | Other, mixed, or unspecified drug abuse, episodic                                                                   | 42  |
| 305.52 | Opioid abuse, episodic                                                                                              | 36  |
| 304.73 | Combinations of opioid type drug with any other drug dependence, in remission                                       | 32  |
| 965.02 | Poisoning by methadone                                                                                              | 25  |
| 292.12 | Drug-induced psychotic disorder with hallucinations                                                                 | 24  |
| 304.72 | Combinations of opioid type drug with any other drug dependence, episodic                                           | 18  |
| 304.92 | Unspecified drug dependence, episodic                                                                               | 14  |

|        |                                                   |    |
|--------|---------------------------------------------------|----|
| E850.0 | Accidental poisoning by heroin                    | 10 |
| 292.11 | Drug-induced psychotic disorder with delusions    | 7  |
| E850.1 | Accidental poisoning by methadone                 | 4  |
| E935.0 | Heroin causing adverse effects in therapeutic use | 3  |

eTable 2: Comprehensive Adjusted Cox Regression Effects Model.

| Covariate                 | Hazard ratio | Confidence interval, low | Confidence interval, high | p-value |
|---------------------------|--------------|--------------------------|---------------------------|---------|
| Duration in weeks         | 1.199        | 1.185                    | 1.214                     | < 1e-04 |
| Dose in 10 MME/day        | 1.008        | 1.003                    | 1.013                     | 0.00126 |
| Age 15-25 vs. <15         | 5.149        | 3.904                    | 6.791                     | < 1e-04 |
| Age 25-35 vs. <15         | 2.434        | 1.829                    | 3.24                      | < 1e-04 |
| Age 35-45 vs. <15         | 1.89         | 1.425                    | 2.506                     | < 1e-04 |
| Age 45-55 vs. <15         | 1.512        | 1.141                    | 2.004                     | 0.00404 |
| Age 55-65 vs. <15         | 1.331        | 1.001                    | 1.77                      | 0.04908 |
| Age 65+ vs. <15           | 1.179        | 0.877                    | 1.586                     | 0.27438 |
| Benzodiazepine use        | 1.774        | 1.635                    | 1.926                     | < 1e-04 |
| Male                      | 1.293        | 1.203                    | 1.391                     | < 1e-04 |
| Hydrocodone vs. Codeine   | 1.067        | 0.894                    | 1.274                     | 0.47152 |
| Hydromorphone vs. Codeine | 1.76         | 1.37                     | 2.26                      | < 1e-04 |
| Mixed types vs. Codeine   | 1.468        | 1.198                    | 1.799                     | 0.00022 |
| Morphine vs. Codeine      | 2.247        | 1.38                     | 3.658                     | 0.00113 |
| Oxycodone vs. Codeine     | 1.236        | 1.034                    | 1.477                     | 0.01965 |
| Oxymorphone vs. Codeine   | 2.039        | 0.281                    | 14.8                      | 0.48121 |
| Tramadol vs. Codeine      | 0.956        | 0.713                    | 1.281                     | 0.76216 |
| State: AK                 | 0.827        | 0.5                      | 1.367                     | 0.45767 |
| State: AL                 | 0.827        | 0.494                    | 1.384                     | 0.46909 |
| State: AR                 | 0.725        | 0.453                    | 1.16                      | 0.18023 |
| State: AZ                 | 1.004        | 0.77                     | 1.309                     | 0.97464 |
| State: CA                 | 0.901        | 0.717                    | 1.133                     | 0.37235 |
| State: CO                 | 0.936        | 0.688                    | 1.273                     | 0.67416 |
| State: CT                 | 0.968        | 0.752                    | 1.246                     | 0.80141 |
| State: DC                 | 0.907        | 0.556                    | 1.481                     | 0.69672 |
| State: DE                 | 0.749        | 0.42                     | 1.334                     | 0.32578 |
| State: FL                 | 0.86         | 0.683                    | 1.083                     | 0.19980 |
| State: GA                 | 0.844        | 0.64                     | 1.111                     | 0.22664 |
| State: HI                 | 0            | 0                        | 1.224e+259                | 0.97004 |
| State: IA                 | 0.487        | 0.214                    | 1.109                     | 0.08659 |
| State: ID                 | 1.18         | 0.744                    | 1.872                     | 0.48210 |
| State: IL                 | 0.684        | 0.506                    | 0.924                     | 0.01326 |

|           |       |       |       |         |
|-----------|-------|-------|-------|---------|
| State: IN | 0.686 | 0.457 | 1.031 | 0.07004 |
| State: KS | 0.433 | 0.256 | 0.734 | 0.00186 |
| State: KY | 0.896 | 0.593 | 1.353 | 0.60011 |
| State: LA | 1.09  | 0.797 | 1.489 | 0.58992 |
| State: MA | 0.831 | 0.561 | 1.231 | 0.35659 |
| State: MD | 0.898 | 0.698 | 1.156 | 0.40474 |
| State: ME | 0.788 | 0.559 | 1.111 | 0.17471 |
| State: MI | 0.58  | 0.409 | 0.821 | 0.00215 |
| State: MN | 0.875 | 0.517 | 1.482 | 0.61963 |
| State: MO | 0.628 | 0.434 | 0.909 | 0.01376 |
| State: MS | 1.457 | 1.017 | 2.087 | 0.04002 |
| State: MT | 0.505 | 0.16  | 1.592 | 0.24366 |
| State: NC | 0.501 | 0.336 | 0.749 | 0.00075 |
| State: ND | 0.358 | 0.05  | 2.566 | 0.30650 |
| State: NE | 0.516 | 0.251 | 1.059 | 0.07142 |
| State: NH | 0.941 | 0.546 | 1.622 | 0.82753 |
| State: NJ | 1.016 | 0.81  | 1.275 | 0.89146 |
| State: NM | 1.384 | 0.607 | 3.153 | 0.43927 |
| State: NV | 1.531 | 1.116 | 2.102 | 0.00838 |
| State: NY | 1.206 | 0.96  | 1.515 | 0.10790 |
| State: OH | 0.674 | 0.519 | 0.877 | 0.00323 |
| State: OK | 1.125 | 0.843 | 1.503 | 0.42380 |
| State: OR | 0.835 | 0.531 | 1.312 | 0.43430 |
| State: PA | 0.871 | 0.691 | 1.099 | 0.24500 |
| State: RI | 1.356 | 0.66  | 2.788 | 0.40689 |
| State: SC | 0.717 | 0.453 | 1.137 | 0.15719 |
| State: SD | 1.256 | 0.31  | 5.092 | 0.74962 |
| State: TN | 1.176 | 0.863 | 1.602 | 0.30351 |
| State: TX | 0.966 | 0.781 | 1.196 | 0.75417 |
| State: UT | 1.008 | 0.712 | 1.428 | 0.96332 |
| State: VA | 0.571 | 0.434 | 0.751 | < 1e-04 |
| State: VT | 1.393 | 0.567 | 3.42  | 0.46966 |
| State: WA | 1.198 | 0.929 | 1.545 | 0.16375 |
| State: WI | 0.674 | 0.429 | 1.059 | 0.08735 |
| State: WV | 0.618 | 0.331 | 1.151 | 0.12920 |

|                                                                             |       |       |       |         |
|-----------------------------------------------------------------------------|-------|-------|-------|---------|
| State: WY                                                                   | 1.783 | 0.566 | 5.624 | 0.32350 |
| Surgery year: 2009                                                          | 1.041 | 0.933 | 1.16  | 0.47499 |
| Surgery year: 2010                                                          | 1.082 | 0.964 | 1.214 | 0.17946 |
| Surgery year: 2011                                                          | 1.077 | 0.952 | 1.218 | 0.23670 |
| Surgery year: 2012                                                          | 1.258 | 1.106 | 1.431 | 0.00048 |
| Surgery year: 2013                                                          | 1.273 | 1.107 | 1.465 | 0.00072 |
| Surgery year: 2014                                                          | 1.795 | 1.536 | 2.097 | < 1e-04 |
| Surgery year: 2015                                                          | 2.464 | 1.744 | 3.48  | < 1e-04 |
| Surgery type: Auditory.system                                               | 1.109 | 0.662 | 1.857 | 0.69404 |
| Surgery type:<br>Cardiovascular.system                                      | 0.979 | 0.775 | 1.237 | 0.85951 |
| Surgery type: Digestive.system                                              | 1.059 | 0.911 | 1.23  | 0.45481 |
| Surgery type: Endocrine.system                                              | 1.281 | 0.968 | 1.696 | 0.08331 |
| Surgery type:<br>Female.genital.system                                      | 1.084 | 0.911 | 1.29  | 0.36224 |
| Surgery type:<br>Hernic.and.lymphatic.systems                               | 1.032 | 0.756 | 1.409 | 0.84401 |
| Surgery type:<br>Integumentary.system                                       | 1.109 | 0.936 | 1.313 | 0.23051 |
| Surgery type: Male.genital.system                                           | 0.831 | 0.618 | 1.118 | 0.22145 |
| Surgery type:<br>Maternity.care.and.delivery                                | 1.048 | 0.555 | 1.978 | 0.88447 |
| Surgery type:<br>Mediastinum.and.diaphragm                                  | 1.675 | 0.923 | 3.042 | 0.08989 |
| Surgery type:<br>Musculoskeletal.system                                     | 1.099 | 0.951 | 1.271 | 0.20134 |
| Surgery type: Nervous.system                                                | 0.717 | 0.607 | 0.848 | 0.00010 |
| Surgery type: Reproductive.system                                           | 0     | 0     | Inf   | 0.99714 |
| Surgery type: Respiratory.system                                            | 0.901 | 0.622 | 1.304 | 0.57901 |
| Surgery type: Urinary.system                                                | 0.875 | 0.671 | 1.142 | 0.32593 |
| 038.9: Septicemia NOS                                                       | 1.481 | 1.073 | 2.044 | 0.01701 |
| 276.51: Dehydration                                                         | 1.076 | 0.876 | 1.322 | 0.48577 |
| 276.8: Hypopotassemia                                                       | 1.148 | 0.942 | 1.4   | 0.17161 |
| 296.32: Major depressive disorder,<br>recurrent episode, moderate<br>degree | 1.505 | 1.218 | 1.86  | 0.00015 |
| 300.00: Anxiety state unspecified                                           | 1.47  | 1.319 | 1.637 | < 1e-04 |

|                                                                                                              |       |       |       |         |
|--------------------------------------------------------------------------------------------------------------|-------|-------|-------|---------|
| 300.02: Generalized anxiety disorder                                                                         | 1.119 | 0.936 | 1.339 | 0.21656 |
| 300.4: Dysthymic disorder                                                                                    | 1.489 | 1.265 | 1.751 | < 1e-04 |
| 305.1: Tobacco use disorder                                                                                  | 2.157 | 1.973 | 2.359 | < 1e-04 |
| 309.28: Adjustment disorder with mixed anxiety and depressed mood                                            | 1.32  | 1.049 | 1.662 | 0.01779 |
| 311: Depressive disorder NEC                                                                                 | 1.601 | 1.439 | 1.781 | < 1e-04 |
| 314.00: Attention deficit disorder of childhood without mention of hyperactivity                             | 1.516 | 1.221 | 1.883 | 0.00017 |
| 314.01: Attention deficit disorder of childhood with hyperactivity                                           | 1.504 | 1.207 | 1.873 | 0.00027 |
| 338.29: Other chronic pain                                                                                   | 2.017 | 1.682 | 2.418 | < 1e-04 |
| 346.90: Migraine, unspecified, without mention of intractable migraine without mention of status migrainosus | 1.326 | 1.121 | 1.57  | 0.00101 |
| 356.9: Unspecified idiopathic peripheral neuropathy                                                          | 1.343 | 1.017 | 1.773 | 0.03776 |
| 462: Acute pharyngitis                                                                                       | 1.153 | 1.024 | 1.298 | 0.01905 |
| 466.0: Acute bronchitis                                                                                      | 1.258 | 1.101 | 1.436 | 0.00072 |
| 473.9: Chronic sinusitis NOS                                                                                 | 1.103 | 0.922 | 1.318 | 0.28329 |
| 493.90: Asthma, unspecified type, without mention of status asthmaticus                                      | 1.217 | 1.089 | 1.36  | 0.00052 |
| 518.81: Acute respiratory failure                                                                            | 1.08  | 0.813 | 1.433 | 0.59610 |
| 535.10: Atrophic gastritis, without mention of hemorrhage                                                    | 1.135 | 0.894 | 1.44  | 0.29861 |
| 535.40: Other specified gastritis, without mention of hemorrhage                                             | 1.23  | 0.967 | 1.565 | 0.09174 |
| 535.50: Unspecified gastritis and gastroduodenitis, without mention of hemorrhage                            | 1.067 | 0.888 | 1.283 | 0.48863 |
| 558.9: Other and unspecified noninfectious gastroenteritis and colitis                                       | 1.095 | 0.907 | 1.321 | 0.34494 |
| 564.00: Constipation NOS                                                                                     | 1.229 | 1.049 | 1.438 | 0.01047 |
| 682.6: Cellulitis and abscess of leg,                                                                        | 1.475 | 1.102 | 1.974 | 0.00892 |



except foot

|                                                                     |       |       |       |         |
|---------------------------------------------------------------------|-------|-------|-------|---------|
| 714.0: Rheumatoid arthritis                                         | 1.417 | 1.104 | 1.819 | 0.00613 |
| 721.3: Lumbosacral spondylosis without myelopathy                   | 1.339 | 1.129 | 1.588 | 0.00082 |
| 722.4: Degeneration of cervical intervertebral disc                 | 1.269 | 1.043 | 1.545 | 0.01747 |
| 722.52: Degeneration of lumbar or lumbosacral intervertebral disc   | 1.055 | 0.896 | 1.242 | 0.52376 |
| 723.1: Cervicalgia                                                  | 1.079 | 0.95  | 1.226 | 0.24348 |
| 723.4: Brachial neuritis or radiculitis NOS                         | 1.178 | 0.977 | 1.421 | 0.08622 |
| 724.2: Lumbago                                                      | 1.287 | 1.154 | 1.436 | < 1e-04 |
| 724.4: Thoracic or lumbosacral neuritis or radiculitis, unspecified | 1.364 | 1.172 | 1.587 | < 1e-04 |
| 724.5: Backache unspecified                                         | 1.265 | 1.118 | 1.43  | 0.00018 |
| 724.8: Other symptoms referable to back                             | 1.04  | 0.787 | 1.374 | 0.78263 |
| 729.1: Myalgia and myositis unspecified                             | 1.164 | 1.014 | 1.336 | 0.03083 |
| 780.52: Insomnia, unspecified                                       | 1.661 | 1.441 | 1.914 | < 1e-04 |
| 780.53: Hypersomnia with sleep apnea, unspecified                   | 1.131 | 0.9   | 1.419 | 0.29070 |
| 780.79: Other malaise and fatigue                                   | 1.252 | 1.139 | 1.375 | < 1e-04 |
| 780.97: Altered mental status                                       | 1.271 | 0.923 | 1.749 | 0.14119 |
| 783.21: Loss of weight                                              | 1.252 | 0.999 | 1.569 | 0.05132 |
| 784.0: Headache                                                     | 1.157 | 1.028 | 1.302 | 0.01537 |
| 785.0: Tachycardia NOS                                              | 1.022 | 0.823 | 1.27  | 0.84102 |
| 786.09: Other dyspnea and respiratory abnormality                   | 1.081 | 0.942 | 1.241 | 0.26638 |
| 786.2: Cough                                                        | 1.035 | 0.919 | 1.166 | 0.56788 |
| 786.50: Unspecified chest pain                                      | 1.034 | 0.932 | 1.148 | 0.52593 |
| 787.01: Nausea with vomiting                                        | 1.173 | 1.02  | 1.349 | 0.02515 |
| 787.03: Vomiting alone                                              | 1.349 | 1.126 | 1.616 | 0.00118 |
| 787.3: Flatulence, eructation, and gas pain                         | 1.142 | 0.915 | 1.425 | 0.24016 |
| 787.91: Diarrhea                                                    | 1.192 | 1.023 | 1.389 | 0.02403 |
| 789.00: Abdominal pain,                                             | 1.122 | 1.018 | 1.237 | 0.02002 |

|                                                                           |       |       |       |         |
|---------------------------------------------------------------------------|-------|-------|-------|---------|
| unspecified site                                                          |       |       |       |         |
| 789.07: Abdominal pain, generalized                                       | 1.288 | 1.124 | 1.476 | 0.00026 |
| 789.09: Abdominal pain, other specified site; multiple sites              | 1.169 | 1.031 | 1.326 | 0.01491 |
| 789.59: Other ascites                                                     | 1.037 | 0.778 | 1.382 | 0.80394 |
| 847.0: Neck sprain                                                        | 1.543 | 1.28  | 1.86  | < 1e-04 |
| 959.09: Injury of face and neck                                           | 1.487 | 1.165 | 1.899 | 0.00146 |
| 959.11: Other injury of chest wall                                        | 1.253 | 0.944 | 1.664 | 0.11821 |
| V45.4: Postsurgical arthrodesis status                                    | 1.27  | 1.025 | 1.572 | 0.02847 |
| V45.86: Bariatric surgery status                                          | 2.195 | 1.77  | 2.724 | < 1e-04 |
| V58.81: Encounter for fitting and adjustment of vascular catheter         | 1.046 | 0.847 | 1.294 | 0.67452 |
| V58.82: Encounter for fitting and adjustment of non-vascular catheter NEC | 1.168 | 0.91  | 1.5   | 0.22360 |
| V70.0: Routine general medical examination at a health care facility      | 0.769 | 0.691 | 0.855 | < 1e-04 |
| V71.89: Observation for other specified suspected conditions              | 1.191 | 0.902 | 1.573 | 0.21687 |
| V76.12: Other screening mammogram                                         | 0.928 | 0.813 | 1.059 | 0.26826 |
| V85.4: Body Mass Index 40 and over, adult                                 | 1.278 | 0.989 | 1.65  | 0.06078 |

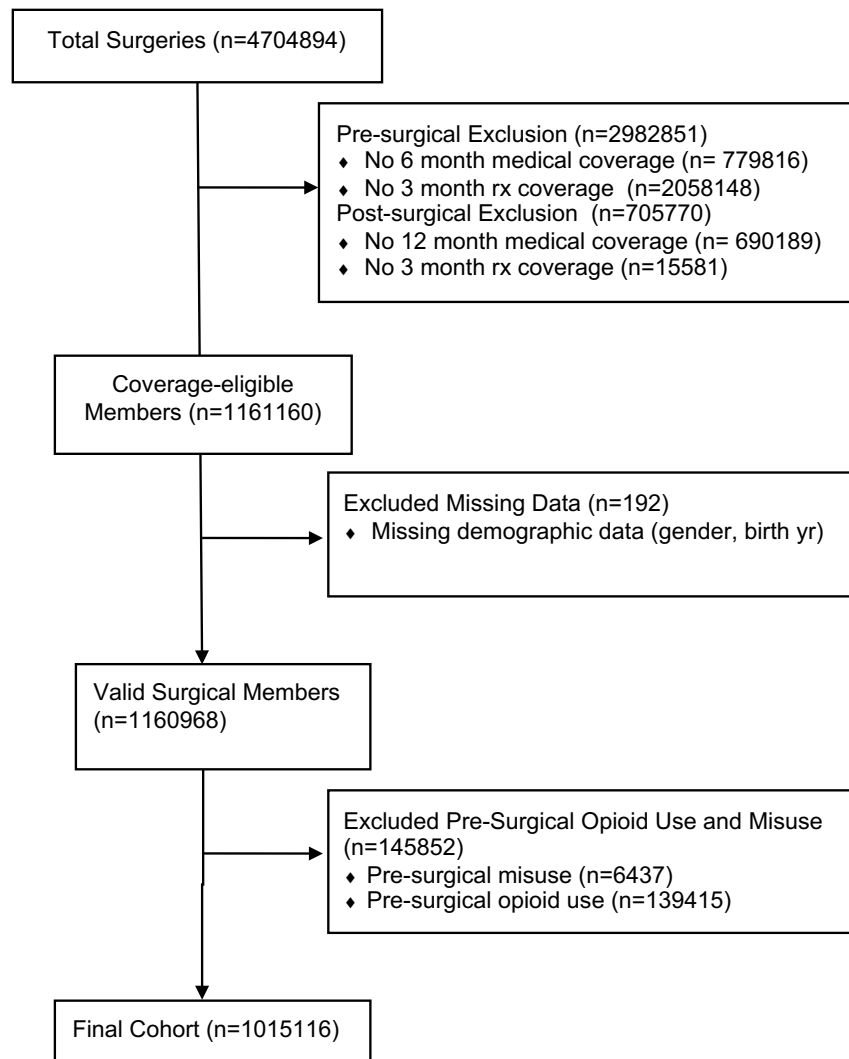

eFigure 1: CONSORT Diagram of Cohort Derivation.

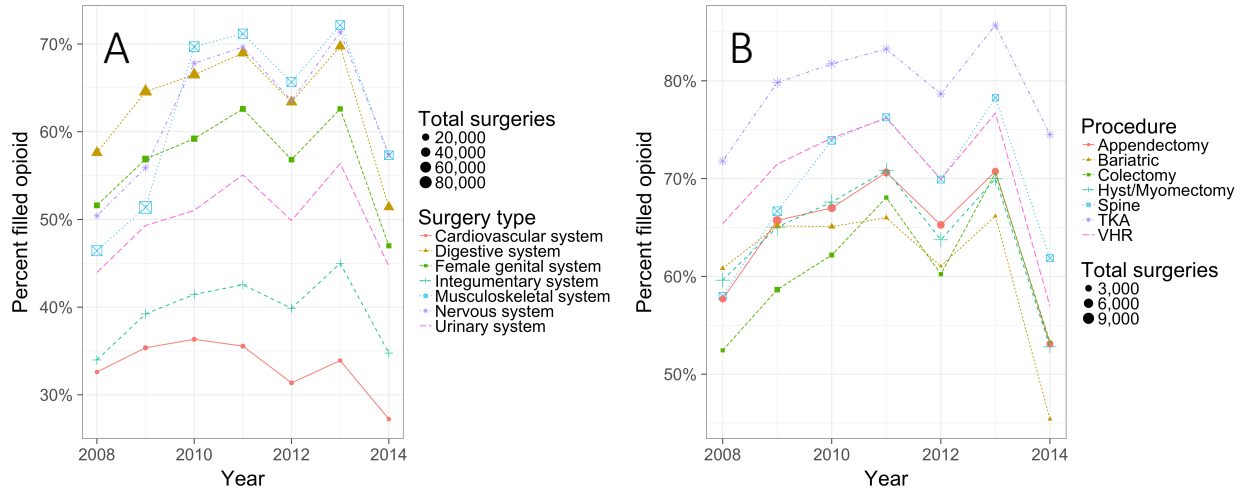

eFigure 2: Rate of Post-Discharge Opioid Prescriptions During the Years of the Study. The graphs are arranged by (A) surgery type and (B) select representative surgeries. The size of each data point represents the number of surgical events.

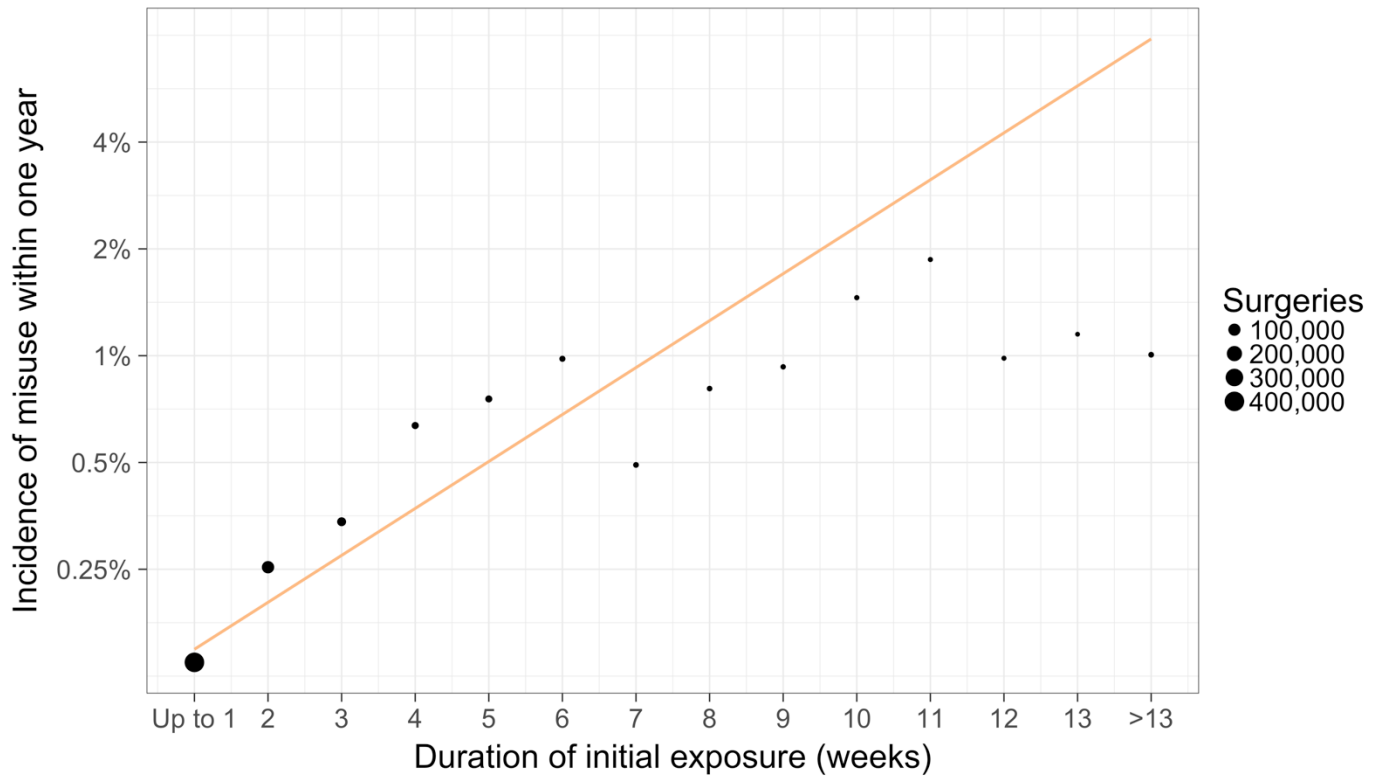

eFigure 3: Incidence of Opioid Abuse and Overdose Within One Year After Surgery by Week of Exposure. The relationship between rates of opioid abuse and weeks of post-surgical opioid prescription. The size of each data point represents the number of surgical events. Y axis is represented on a log scale.

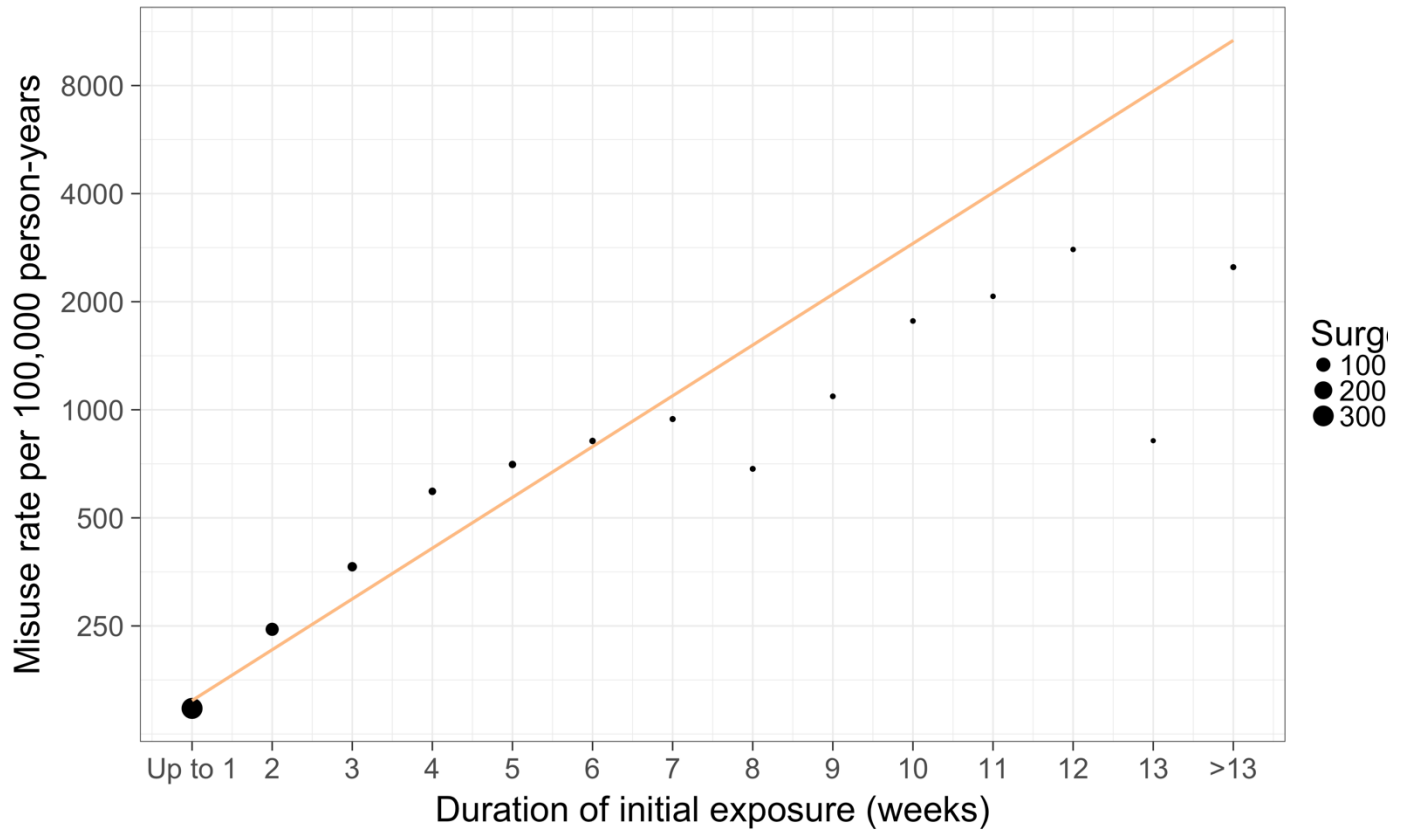

eFigure 4: Rate of Opioid Abuse and Overdose Among Those with No Subsequent Surgery by Week of Exposure. The relationship between rates of overdose and weeks of post-surgical opioid prescription duration for patients who did not have subsequent surgeries after the index surgery. The size of each data point represents the number of surgical events. Y axis is represented on a log scale.
